# Supplementary material for: Tailoring OER/ORR activity in TM1N4 catalysts through first-/second-shell nitrogen doping: a density functional theory investigation
Source: Royal Society of Chemistry journal article supplement (doi:10.1039/d4cp04283b), 2025-01-01
Supplement: d4cp04283b1.pdf [file d4cp04283b1.pdf]

## Supporting Information

### Tailoring OER/ORR Activity in $\text{TM}_1\text{N}_4$ Catalysts through First-/Second-Shell

#### Nitrogen Doping: A Density Functional Theory Investigation

Qingqing Cai<sup>a</sup>, Wenmei Wuxia<sup>a</sup>, HuanHuan Li<sup>a</sup>, Can Li<sup>a,\*</sup>, Yinyan Gong<sup>a</sup>, Lengyuan Niu<sup>a</sup> and  
Tao Wang<sup>b</sup>

<sup>a</sup> Institute of Optoelectronic Materials and Devices, College of Optical and Electronic  
Technology, China Jiliang University, Hangzhou 310018, China

<sup>b</sup> School of Micro-Nano Electronics, Zhejiang University, Hangzhou, 310027, China

Email: [canli1983@gmail.com](mailto:canli1983@gmail.com)

## Simulation Details

The electrochemical model of OER/ORR in alkaline media could be divided into the four one-electron reactions:

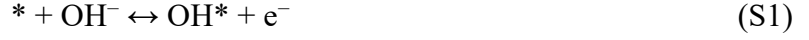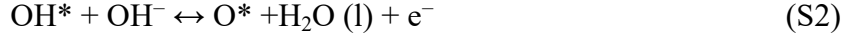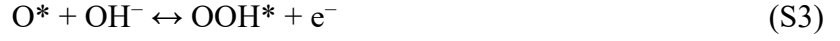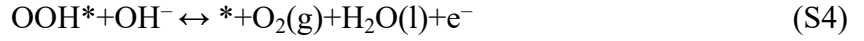

where the \* denoted the active site. The adsorption energies of intermediates (OH, O and OOH groups) on substrates were calculated by following:

$$\Delta E_{*O} = E(\text{sub/O}) - E(\text{sub}) - [E(\text{H}_2\text{O}) - E(\text{H}_2)] \quad (\text{S5})$$

$$\Delta E_{*OH} = E(\text{sub/OH}) - E(\text{sub}) - [E(\text{H}_2\text{O}) - E(\text{H}_2)/2] \quad (\text{S6})$$

$$\Delta E_{*OOH} = E(\text{sub/OOH}) - E(\text{sub}) - [2 \times E(\text{H}_2\text{O}) - 3 \times E(\text{H}_2)/2] \quad (\text{S7})$$

where  $E(\text{sub/H}_2\text{O})$ ,  $E(\text{sub/OH})$ ,  $E(\text{sub/O})$  and  $E(\text{sub/OOH})$  denoted the total energies of  $\text{H}_2\text{O}$ , OH, O and OOH groups on substrates.  $E(\text{sub})$ ,  $E(\text{H}_2\text{O})$  and  $E(\text{H}_2)$  were the energies of bare substrate, water, and hydrogen gas, respectively.

The Gibbs free energy changes of steps S1-S4 could be estimated by:

$$\Delta G_1 = \Delta G_{\text{OH}^*} \quad (\text{S8})$$

$$\Delta G_2 = \Delta G_{\text{O}^*} - \Delta G_{\text{OH}^*} \quad (\text{S9})$$

$$\Delta G_3 = \Delta G_{\text{OOH}^*} - \Delta G_{\text{O}^*} \quad (\text{S10})$$

$$\Delta G_4 = 4.92 \text{ eV} - \Delta G_{\text{OOH}^*} \quad (\text{S11})$$

where the sum of  $\Delta G_{1-4}$  was fixed to the negative of experimental Gibbs free energy of formation of two water molecules ( $-2 \Delta_{\text{H}_2\text{O}}^{\text{exp}} = 4.92 \text{ eV}$ ). The Gibbs free energy of ( $\text{H}^+ + \text{e}^-$ ) in solution was estimated as the half energy of  $\text{H}_2$  molecule at standard condition.

The overpotential of OER was determined by following equations:

$$\eta^{\text{OER}} = U_{\text{OER}} - 1.23 \quad (\text{S12})$$

$$U_{\text{OER}} = \text{Max}(\Delta G_1, \Delta G_2, \Delta G_3, \Delta G_4)/e \quad (\text{S13})$$

The overpotential of ORR was expressed as:

$$\eta^{\text{ORR}} = 1.23 - U_{\text{ORR}} \quad (\text{S14})$$

$$U_{\text{ORR}} = \text{Min}(\Delta G_1, \Delta G_2, \Delta G_3, G_4)/e \quad (\text{S15})$$

The proportional relationships between the  $\Delta G_{\text{O}^*}$ ,  $\Delta G_{\text{OH}^*}$  and  $\Delta G_{\text{OOH}^*}$  values:

$$\Delta G_{\text{OH}^*} = 0.611 \times \Delta G_{\text{O}^*} - 0.557 \quad (\text{S16})$$

$$\Delta G_{\text{OOH}^*} = 0.510 \times \Delta G_{\text{O}^*} + 2.431 \quad (\text{S17})$$

The proportional relationships between the  $\Delta G$  and  $D_d$  values:

$$\Delta G_{\text{OH}^*} = 0.088 \times D_d - 1.124 \quad (\text{S18})$$

$$\Delta G_{\text{O}^*} = 0.141 \times D_d - 0.849 \quad (\text{S19})$$

$$\Delta G_{\text{OOH}^*} = 0.079 \times D_d + 1.806 \quad (\text{S20})$$

**Table S1.** The formation energy of all systems.

| Coordination Environment                 | Dopant Position | $E_{\text{system}}$ (eV) | $E_{\text{C}}$ (eV) | $E_{\text{N}}$ (eV) | $E_{\text{TM}}$ (eV) | $\Delta E_{\text{form}}$ (eV) |
|------------------------------------------|-----------------|--------------------------|---------------------|---------------------|----------------------|-------------------------------|
| Fe <sub>1</sub> -pyridine N <sub>4</sub> | Pristine        | -13528.163               | -145.717            | -261.366            | -2856.365            | -9.012                        |
|                                          | N1 site         | -13643.767               |                     |                     |                      | -8.967                        |
|                                          | N2 site         | -13643.775               |                     |                     |                      | -8.975                        |
|                                          | N3 site         | -13643.779               |                     |                     |                      | -8.979                        |
| Co <sub>1</sub> -pyridine N <sub>4</sub> | Pristine        | -11187.764               |                     |                     | -515.957             | -9.021                        |
|                                          | N1 site         | -11303.357               |                     |                     |                      | -8.965                        |
|                                          | N2 site         | -11303.366               |                     |                     |                      | -8.974                        |
|                                          | N3 site         | -11303.381               |                     |                     |                      | -8.989                        |
| Ni <sub>1</sub> -pyridine N <sub>4</sub> | Pristine        | -14566.938               |                     |                     | -3895.158            | -8.994                        |
|                                          | N1 site         | -14682.467               |                     |                     |                      | -8.874                        |
|                                          | N2 site         | -14682.585               |                     |                     |                      | -8.992                        |
|                                          | N3 site         | -14682.592               |                     |                     |                      | -8.999                        |
| Fe <sub>1</sub> -pyrrolee N <sub>4</sub> | Pristine        | -12653.816               |                     |                     | -2856.365            | -8.967                        |
|                                          | N1 site         | -12769.412               |                     |                     |                      | -8.914                        |
|                                          | N2 site         | -12769.419               |                     |                     |                      | -8.921                        |
|                                          | N3 site         | -12769.443               |                     |                     |                      | -8.945                        |
| Co <sub>1</sub> -pyrrolee N <sub>4</sub> | Pristine        | -10313.395               | -515.957            | -8.954              |                      |                               |
|                                          | N1 site         | -10428.994               |                     | -8.904              |                      |                               |
|                                          | N2 site         | -10429.007               |                     | -8.917              |                      |                               |
|                                          | N3 site         | -10429.015               |                     | -8.925              |                      |                               |
| Ni <sub>1</sub> -pyrrolee N <sub>4</sub> | Pristine        | -13692.476               | -3895.158           | -8.834              |                      |                               |
|                                          | N1 site         | -13808.071               |                     | -8.780              |                      |                               |
|                                          | N2 site         | -13808.085               |                     | -8.794              |                      |                               |
|                                          | N3 site         | -13808.093               |                     | -8.802              |                      |                               |

**Table S2.** The lengths of  $\text{TM}_1\text{-N}$  bonds ( $d_{\text{TM}_1\text{-N}}$ ), the estimated dynamic volume of  $d$  electron ( $V_d$ ) and  $d$  electron density ( $D_d$ ) of each  $\text{TM}_1$  ion.

| Coordination Environment                 | Dopant   | $d_{\text{TM}_1\text{-N}}$ (Å) |        |        |        | $V_d$<br>(Å <sup>3</sup> ) | $D_d$<br>(e/Å <sup>3</sup> ) |
|------------------------------------------|----------|--------------------------------|--------|--------|--------|----------------------------|------------------------------|
|                                          | Position | Bond 1                         | Bond 2 | Bond 3 | Bond 4 |                            |                              |
| Fe <sub>1</sub> -pyridine N <sub>4</sub> | Pristine | 1.891                          | 1.891  | 1.891  | 1.891  | 0.918                      | 26.144                       |
|                                          | N1 site  | 1.871                          | 1.899  | 1.892  | 1.877  | 0.909                      | 26.402                       |
|                                          | N2 site  | 1.894                          | 1.886  | 1.886  | 1.894  | 0.917                      | 26.185                       |
|                                          | N3 site  | 1.908                          | 1.901  | 1.887  | 1.888  | 0.925                      | 25.936                       |
| Co <sub>1</sub> -pyridine N <sub>4</sub> | Pristine | 1.884                          | 1.884  | 1.884  | 1.884  | 0.905                      | 30.941                       |
|                                          | N1 site  | 1.867                          | 1.893  | 1.883  | 1.869  | 0.896                      | 31.236                       |
|                                          | N2 site  | 1.883                          | 1.879  | 1.879  | 1.883  | 0.900                      | 31.090                       |
|                                          | N3 site  | 1.901                          | 1.893  | 1.879  | 1.881  | 0.912                      | 30.719                       |
| Ni <sub>1</sub> -pyridine N <sub>4</sub> | Pristine | 1.881                          | 1.881  | 1.881  | 1.881  | 0.898                      | 35.646                       |
|                                          | N1 site  | 1.883                          | 1.883  | 1.877  | 1.873  | 0.895                      | 35.759                       |
|                                          | N2 site  | 1.885                          | 1.876  | 1.876  | 1.885  | 0.897                      | 35.673                       |
|                                          | N3 site  | 1.901                          | 1.890  | 1.879  | 1.880  | 0.907                      | 35.276                       |
| Fe <sub>1</sub> -pyrrolee N <sub>4</sub> | Pristine | 1.972                          | 1.972  | 1.972  | 1.972  | 1.041                      | 23.053                       |
|                                          | N1 site  | 1.997                          | 1.989  | 1.962  | 1.953  | 1.047                      | 22.933                       |
|                                          | N2 site  | 1.974                          | 1.969  | 1.969  | 1.974  | 1.040                      | 23.070                       |
|                                          | N3 site  | 2.013                          | 2.000  | 1.953  | 1.978  | 1.064                      | 22.560                       |
| Co <sub>1</sub> -pyrrolee N <sub>4</sub> | Pristine | 1.989                          | 1.989  | 1.989  | 1.989  | 1.065                      | 26.295                       |
|                                          | N1 site  | 2.020                          | 2.005  | 1.977  | 1.968  | 1.071                      | 26.148                       |
|                                          | N2 site  | 1.991                          | 1.987  | 1.987  | 1.991  | 1.065                      | 26.295                       |
|                                          | N3 site  | 2.033                          | 2.018  | 1.968  | 1.994  | 1.088                      | 25.726                       |
| Ni <sub>1</sub> -pyrrolee N <sub>4</sub> | Pristine | 1.955                          | 1.955  | 1.955  | 1.955  | 1.008                      | 31.749                       |
|                                          | N1 site  | 1.983                          | 1.967  | 1.948  | 1.939  | 1.015                      | 31.536                       |
|                                          | N2 site  | 1.954                          | 1.953  | 1.953  | 1.954  | 1.006                      | 31.822                       |
|                                          | N3 site  | 1.985                          | 1.982  | 1.942  | 1.962  | 1.028                      | 31.129                       |

**Table S3.** The integration of negative crystal orbitals Hamiltonian population (-ICOHP) values of TM<sub>1</sub>-N bonds.

| System      | Bond | -ICOHP (eV) | System      | Bond | -ICOHP (eV) | System      | Bond | -ICOHP (eV) |
|-------------|------|-------------|-------------|------|-------------|-------------|------|-------------|
| Fe-pyridine |      | 0.935       | Co-pyridine |      | 1.236       | Ni-pyridine |      | 0.964       |
| N1 site     | 1    | 1.027       | N1 site     | 1    | 1.275       | N1 site     | 1    | 0.968       |
|             | 2    | 0.908       |             | 2    | 1.193       |             | 2    | 0.914       |
|             | 3    | 0.919       |             | 3    | 1.211       |             | 3    | 0.921       |
|             | 4    | 0.891       |             | 4    | 1.198       |             | 4    | 0.901       |
| N2 site     | 1    | 0.841       | N2 site     | 1    | 1.139       | N2 site     | 1    | 0.864       |
|             | 2    | 0.891       |             | 2    | 1.191       |             | 2    | 0.916       |
|             | 3    | 0.892       |             | 3    | 1.191       |             | 3    | 0.916       |
|             | 4    | 0.841       |             | 4    | 1.139       |             | 4    | 0.864       |
| N3 site     | 1    | 0.823       | N3 site     | 1    | 1.099       | N3 site     | 1    | 0.833       |
|             | 2    | 0.907       |             | 2    | 1.179       |             | 2    | 0.913       |
|             | 3    | 0.914       |             | 3    | 1.212       |             | 3    | 0.932       |
|             | 4    | 0.909       |             | 4    | 1.192       |             | 4    | 0.914       |
| Fe-pyrrolee |      | 0.613       | Co-pyrrolee |      | 0.973       | Ni-pyrrolee |      | 0.787       |
| N1 site     | 1    | 0.709       | N1 site     | 1    | 0.998       | N1 site     | 1    | 0.742       |
|             | 2    | 0.578       |             | 2    | 0.976       |             | 2    | 0.751       |
|             | 3    | 0.598       |             | 3    | 0.988       |             | 3    | 0.749       |
|             | 4    | 0.522       |             | 4    | 0.916       |             | 4    | 0.705       |
| N2 site     | 1    | 0.505       | N2 site     | 1    | 0.889       | N2 site     | 1    | 0.677       |
|             | 2    | 0.561       |             | 2    | 0.945       |             | 2    | 0.725       |
|             | 3    | 0.561       |             | 3    | 0.945       |             | 3    | 0.725       |
|             | 4    | 0.505       |             | 4    | 0.889       |             | 4    | 0.677       |
| N3 site     | 1    | 0.532       | N3 site     | 1    | 0.903       | N3 site     | 1    | 0.689       |
|             | 2    | 0.588       |             | 2    | 0.967       |             | 2    | 0.752       |
|             | 3    | 0.607       |             | 3    | 0.986       |             | 3    | 0.767       |
|             | 4    | 0.578       |             | 4    | 0.964       |             | 4    | 0.753       |

**Table S4.** The free energy of each intermediate ( $\Delta G_{\text{OH}^*}$ ,  $\Delta G_{\text{O}^*}$  or  $\Delta G_{\text{OOH}^*}$ ), the free energy change of each elemental step ( $\Delta G_1$ ,  $\Delta G_2$ ,  $\Delta G_3$  or  $\Delta G_4$ ) and the reaction overpotentials of OER ( $\eta^{\text{OER}}$ ) and ORR ( $\eta^{\text{ORR}}$ ).

| Coordination Environment                 | Dopant Position | $\Delta G_{\text{OH}^*}$<br>(eV) | $\Delta G_{\text{O}^*}$<br>(eV) | $\Delta G_{\text{OOH}^*}$<br>(eV) | $\Delta G_1$<br>(eV) | $\Delta G_2$<br>(eV) | $\Delta G_3$<br>(eV) | $\Delta G_4$<br>(eV) | $\eta^{\text{OER}}$<br>(V) | $\eta^{\text{ORR}}$<br>(V) |
|------------------------------------------|-----------------|----------------------------------|---------------------------------|-----------------------------------|----------------------|----------------------|----------------------|----------------------|----------------------------|----------------------------|
| Fe <sub>1</sub> -pyridine N <sub>4</sub> | Pristine        | 1.021                            | 2.517                           | 3.867                             | 1.021                | 1.496                | 1.350                | 1.053                | 0.266                      | 0.209                      |
|                                          | N1 site         | 1.096                            | 2.702                           | 3.967                             | 1.096                | 1.606                | 1.265                | 0.953                | 0.376                      | 0.277                      |
|                                          | N2 site         | 1.034                            | 2.636                           | 3.881                             | 1.034                | 1.602                | 1.245                | 1.039                | 0.372                      | 0.196                      |
|                                          | N3 site         | 1.011                            | 2.484                           | 3.821                             | 1.011                | 1.473                | 1.337                | 1.099                | 0.243                      | 0.219                      |
| Co <sub>1</sub> -pyridine N <sub>4</sub> | Pristine        | 1.837                            | 3.581                           | 4.512                             | 1.837                | 1.744                | 0.931                | 0.408                | 0.607                      | 0.822                      |
|                                          | N1 site         | 1.862                            | 3.632                           | 4.518                             | 1.862                | 1.770                | 0.886                | 0.402                | 0.632                      | 0.828                      |
|                                          | N2 site         | 1.841                            | 3.616                           | 4.513                             | 1.841                | 1.775                | 0.897                | 0.407                | 0.611                      | 0.823                      |
|                                          | N3 site         | 1.747                            | 3.467                           | 4.371                             | 1.747                | 1.720                | 0.904                | 0.549                | 0.517                      | 0.681                      |
| Ni <sub>1</sub> -pyridine N <sub>4</sub> | Pristine        | 1.821                            | 4.024                           | 4.595                             | 1.821                | 2.203                | 0.571                | 0.325                | 0.973                      | 0.905                      |
|                                          | N1 site         | 1.887                            | 4.098                           | 4.619                             | 1.887                | 2.211                | 0.521                | 0.301                | 0.981                      | 0.929                      |
|                                          | N2 site         | 1.846                            | 4.084                           | 4.598                             | 1.846                | 2.238                | 0.514                | 0.322                | 1.008                      | 0.908                      |
|                                          | N3 site         | 1.789                            | 3.899                           | 4.537                             | 1.789                | 2.110                | 0.638                | 0.383                | 0.880                      | 0.847                      |
| Fe <sub>1</sub> -pyrrolee N <sub>4</sub> | Pristine        | 0.896                            | 2.351                           | 3.687                             | 0.896                | 1.455                | 1.336                | 1.233                | 0.225                      | 0.334                      |
|                                          | N1 site         | 0.845                            | 2.301                           | 3.615                             | 0.845                | 1.456                | 1.314                | 1.305                | 0.226                      | 0.385                      |
|                                          | N2 site         | 0.912                            | 2.378                           | 3.694                             | 0.912                | 1.466                | 1.316                | 1.226                | 0.236                      | 0.318                      |
|                                          | N3 site         | 0.794                            | 2.233                           | 3.512                             | 0.794                | 1.439                | 1.279                | 1.408                | 0.209                      | 0.436                      |
| Co <sub>1</sub> -pyrrolee N <sub>4</sub> | Pristine        | 1.228                            | 3.142                           | 3.845                             | 1.228                | 1.914                | 0.703                | 1.075                | 0.684                      | 0.527                      |
|                                          | N1 site         | 1.213                            | 3.041                           | 3.816                             | 1.213                | 1.828                | 0.775                | 1.104                | 0.598                      | 0.455                      |
|                                          | N2 site         | 1.232                            | 3.155                           | 3.871                             | 1.232                | 1.923                | 0.716                | 1.049                | 0.693                      | 0.514                      |
|                                          | N3 site         | 1.199                            | 2.891                           | 3.743                             | 1.199                | 1.692                | 0.852                | 1.177                | 0.462                      | 0.378                      |
| Ni <sub>1</sub> -pyrrolee N <sub>4</sub> | Pristine        | 1.772                            | 3.698                           | 4.181                             | 1.772                | 1.926                | 0.483                | 0.739                | 0.696                      | 0.747                      |
|                                          | N1 site         | 1.732                            | 3.678                           | 4.177                             | 1.732                | 1.946                | 0.499                | 0.743                | 0.716                      | 0.731                      |
|                                          | N2 site         | 1.798                            | 3.802                           | 4.218                             | 1.798                | 2.004                | 0.416                | 0.702                | 0.774                      | 0.814                      |

|  |         |       |       |       |       |       |       |       |       |       |
|--|---------|-------|-------|-------|-------|-------|-------|-------|-------|-------|
|  | N3 site | 1.689 | 3.647 | 4.148 | 1.689 | 1.958 | 0.501 | 0.772 | 0.728 | 0.729 |
|--|---------|-------|-------|-------|-------|-------|-------|-------|-------|-------|

**Table S5.** The comparison of OER/ORR activity between our systems and other works.

| Electrocatalysts                                                                                   | $\eta^{\text{OER}}$<br>(V) | $\eta^{\text{ORR}}$<br>(V) | Reference |
|----------------------------------------------------------------------------------------------------|----------------------------|----------------------------|-----------|
| N3-doped Fe <sub>1</sub> -pyrrole N <sub>4</sub>                                                   | 209                        |                            | Our work  |
| N2-doped Fe <sub>1</sub> -pyridine N <sub>4</sub>                                                  |                            | 196                        | Our work  |
| Co@N <sub>4</sub> SAC                                                                              | 330                        | 410                        | Ref [1]   |
| IrN <sub>4</sub> -C                                                                                | 300                        | N.A.                       | Ref [2]   |
| g-C <sub>3</sub> N <sub>4</sub> (TM/VN-CN)                                                         | 320                        | 430                        | Ref [3]   |
| TMN <sub>4</sub> @G                                                                                | 260                        | 240                        | Ref [4]   |
| Ir/pyrrolic-N <sub>4</sub> -G                                                                      | 320                        | 340                        | Ref [5]   |
| 3FeCN/S                                                                                            | 260                        | 480                        | Ref [6]   |
| TMN <sub>4</sub> -gra                                                                              | N.A.                       | 339                        | Ref [7]   |
| ((TM-N <sub>x</sub> O <sub>4-x</sub> )@g-C1 <sub>6</sub> N <sub>3</sub> -h <sub>3</sub> , x = 0-4) | 300                        | 460                        | Ref [8]   |



**Figure S1.** The total energies of systems with the initial magnetic moments of Fe, Co and Ni atoms in (a) Fe<sub>1</sub>-pyridine N<sub>4</sub>, (c) Co<sub>1</sub>-pyridine N<sub>4</sub>, (e) Ni<sub>1</sub>-pyridine N<sub>4</sub>, (b) Fe<sub>1</sub>-pyrrole N<sub>4</sub>, (d) Co<sub>1</sub>-pyrrole N<sub>4</sub>, and (f) Ni<sub>1</sub>-pyrrole N<sub>4</sub> systems.

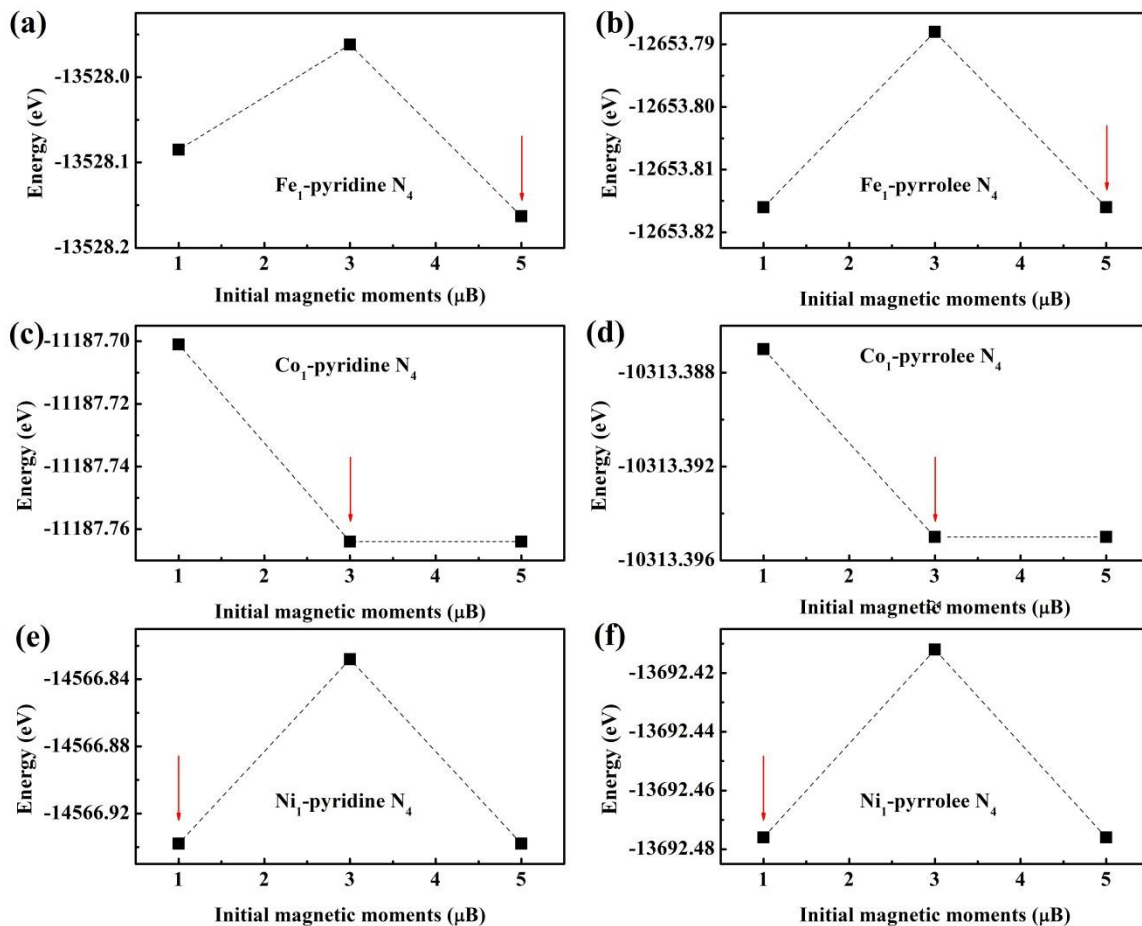

**Figure S2.** The changed percentages (%) of all  $TM_1$ -N bonds. (a) bond 1, (b) bond 2, (c) bond 3 and (d) bond 4.

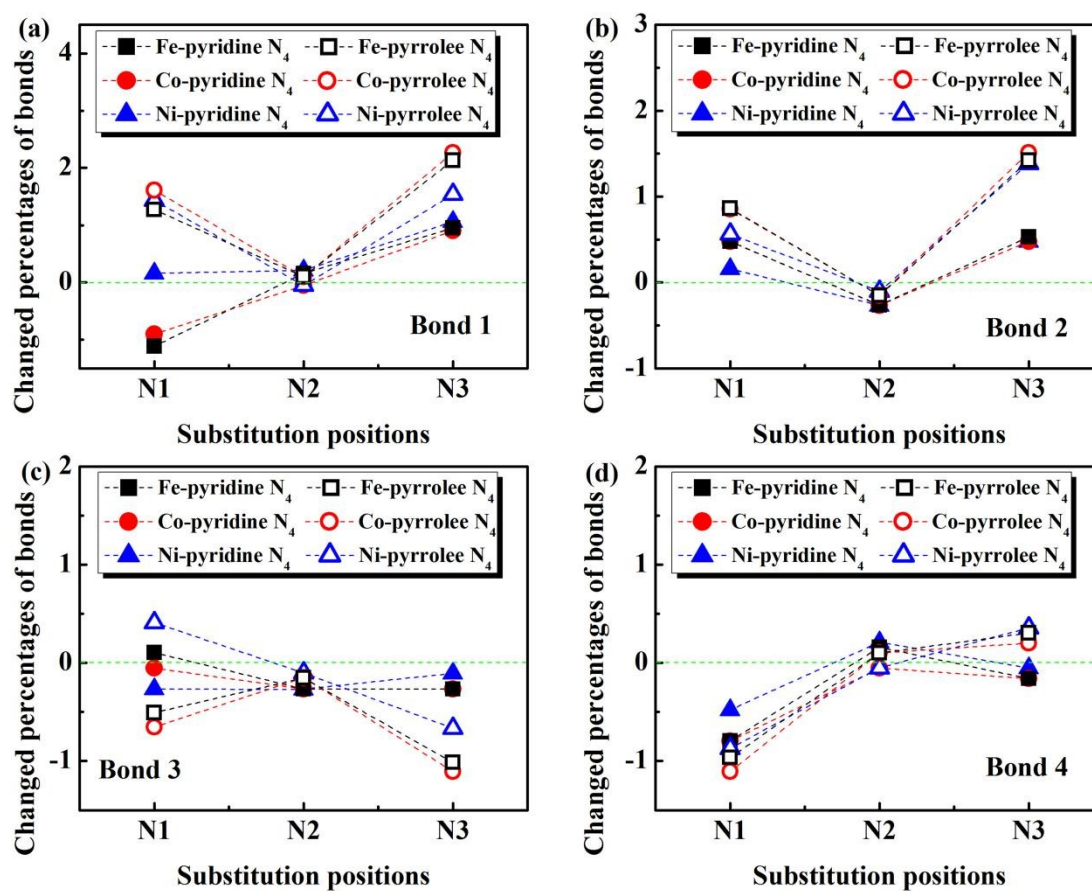

**Figure S3.** The negative crystal orbitals Hamiltonian population (-COHP) of Fe<sub>1</sub>-N bonds in (a) N1 doped, (c) N2 doped and (e) N3 doped Fe<sub>1</sub>-pyridine N<sub>4</sub> active centers, (b) N1 doped, (d) N2 doped and (f) N3 doped Fe<sub>1</sub>-pyrrolee N<sub>4</sub> active centers, comparing for pristine active centers.

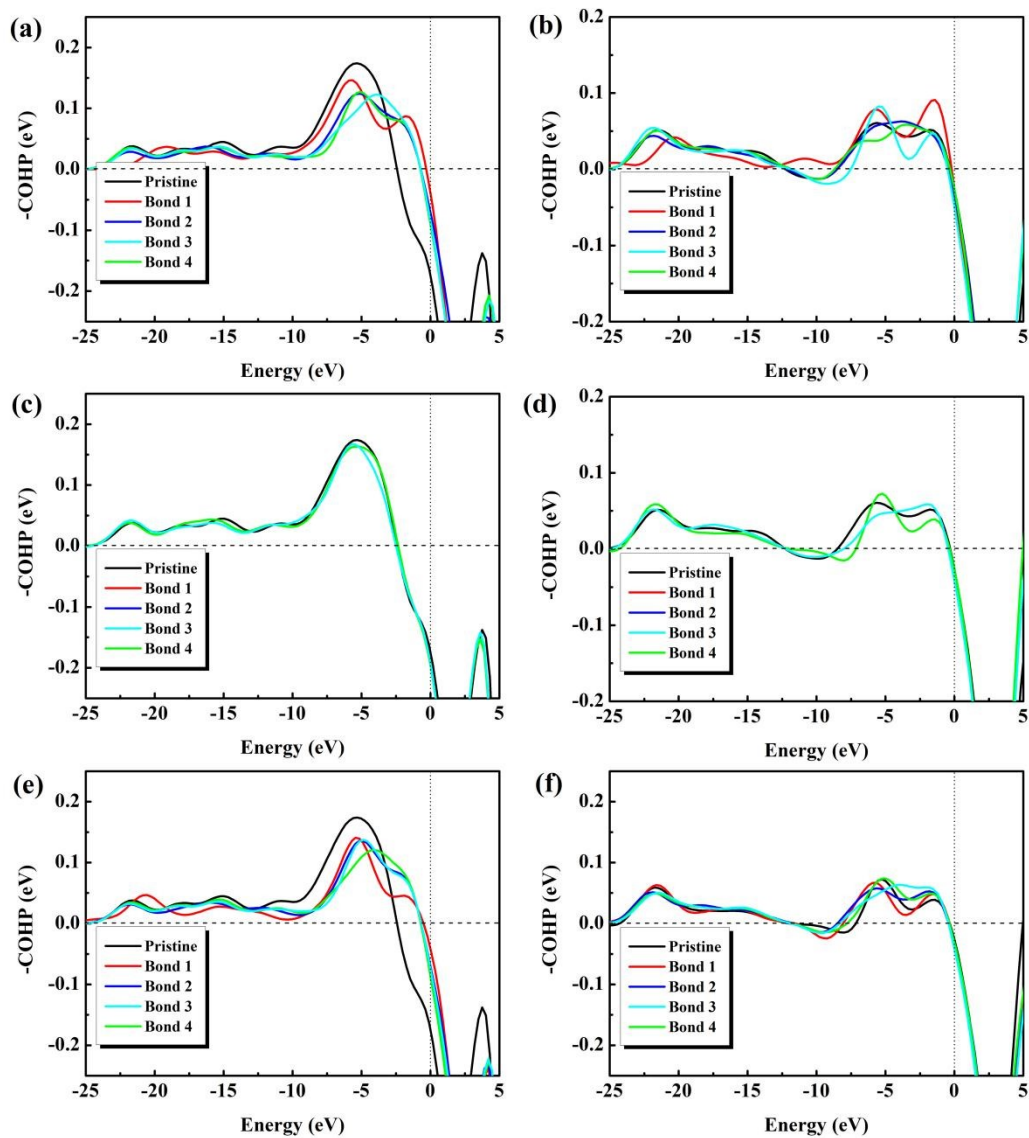

**Figure S4.** The negative crystal orbitals Hamiltonian population (-COHP) of Co<sub>1</sub>-N bonds in (a) N1 doped, (c) N2 doped and (e) N3 doped Co<sub>1</sub>-pyridine N<sub>4</sub> active centers, (b) N1 doped, (d) N2 doped and (f) N3 doped Co<sub>1</sub>-pyrrolee N<sub>4</sub> active centers, comparing for pristine active centers.

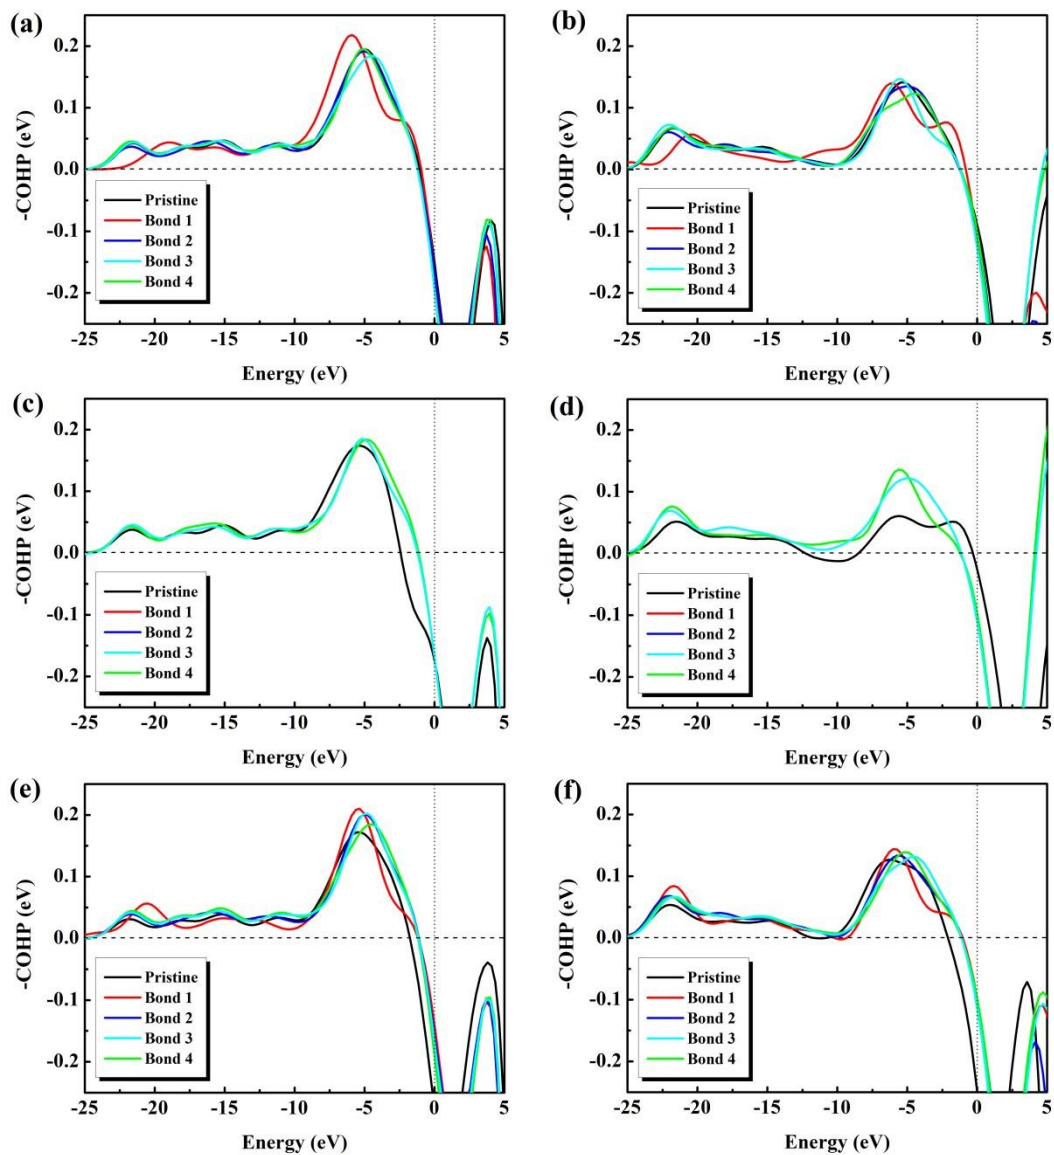

**Figure S5.** The negative crystal orbitals Hamiltonian population (-COHP) of Ni<sub>1</sub>-N bonds in (a) N1 doped, (c) N2 doped and (e) N3 doped Ni<sub>1</sub>-pyridine N<sub>4</sub> active centers, (b) N1 doped, (d) N2 doped and (f) N3 doped Ni<sub>1</sub>-pyrrolee N<sub>4</sub> active centers, comparing for pristine active centers.

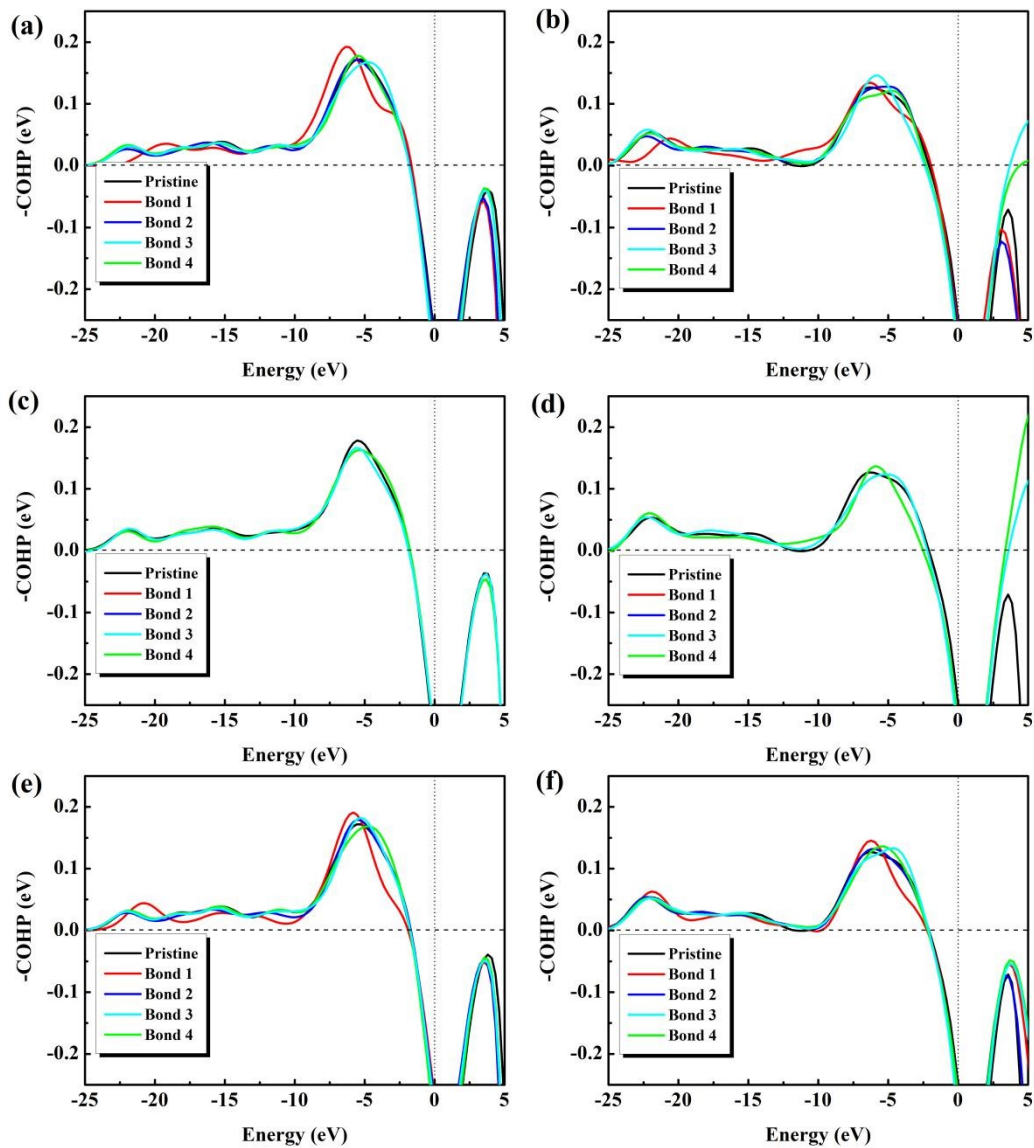

**Figure S6.** The atom structures of (a)  $*$ , (b)  $\text{OH}^*$ , (c)  $\text{O}^*$  and (d)  $\text{OOH}^*$ ,  $*$  denoted the active site of TM monoatom in  $\text{TM}_1$ -pyridine  $\text{N}_4$  systems, where the white, red, gray, blue and green balls denoted the H, O, C, N and TM atoms.

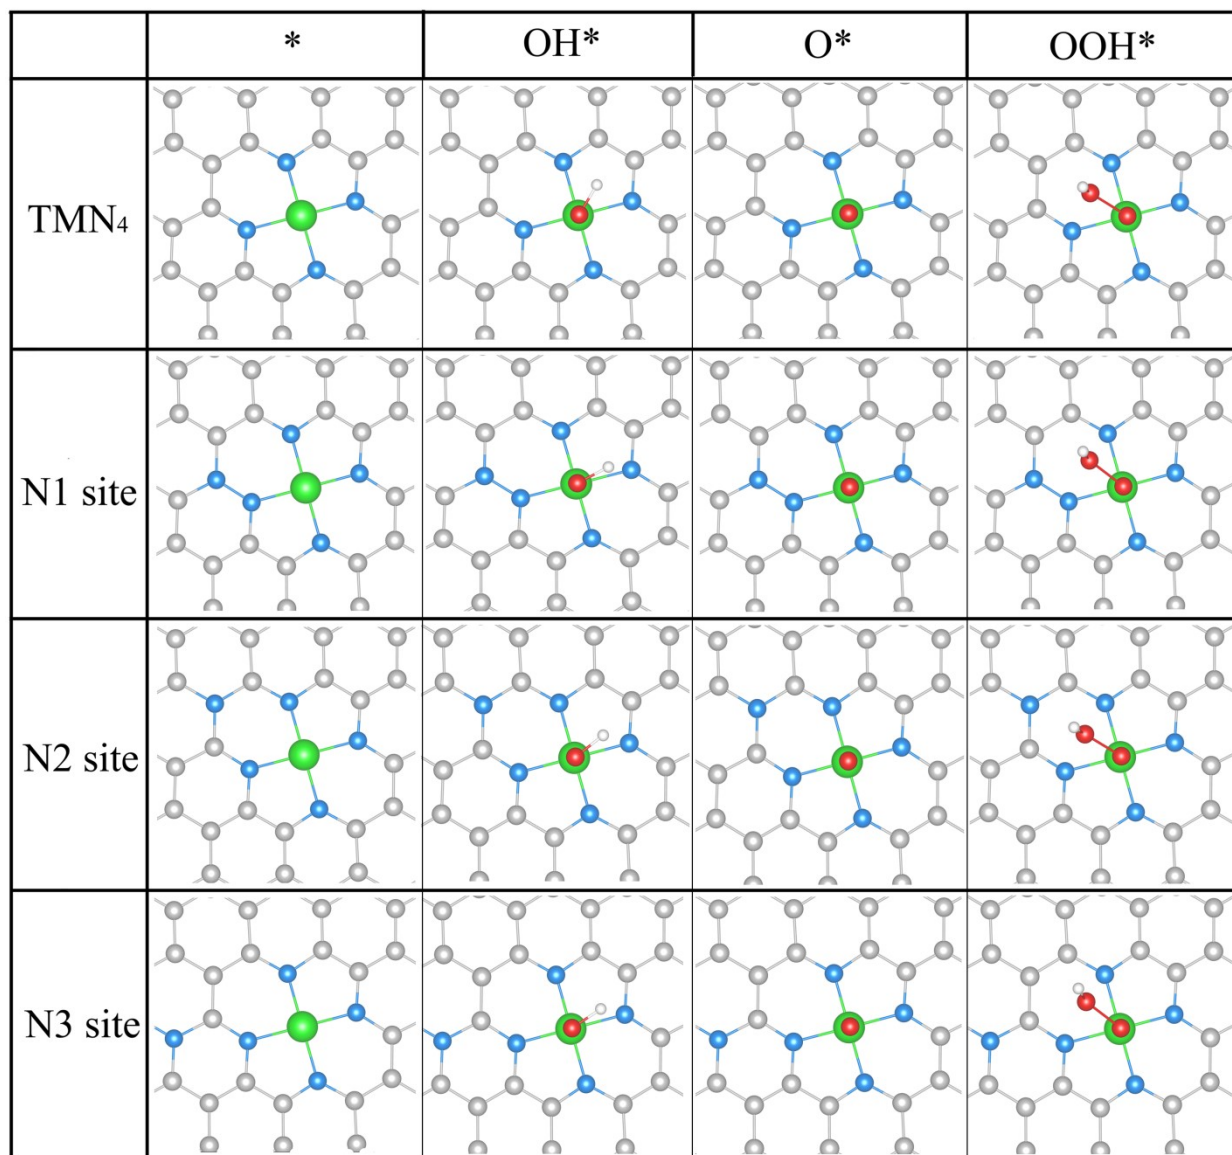

**Figure S7.** The atom structures of (a)  $*$ , (b)  $\text{OH}^*$ , (c)  $\text{O}^*$  and (d)  $\text{OOH}^*$ ,  $*$  denoted the active site of TM monoatom in  $\text{TM}_1$ -pyrrolee  $\text{N}_4$  systems, where the white, red, gray, blue and green balls denoted the H, O, C, N and TM atoms.

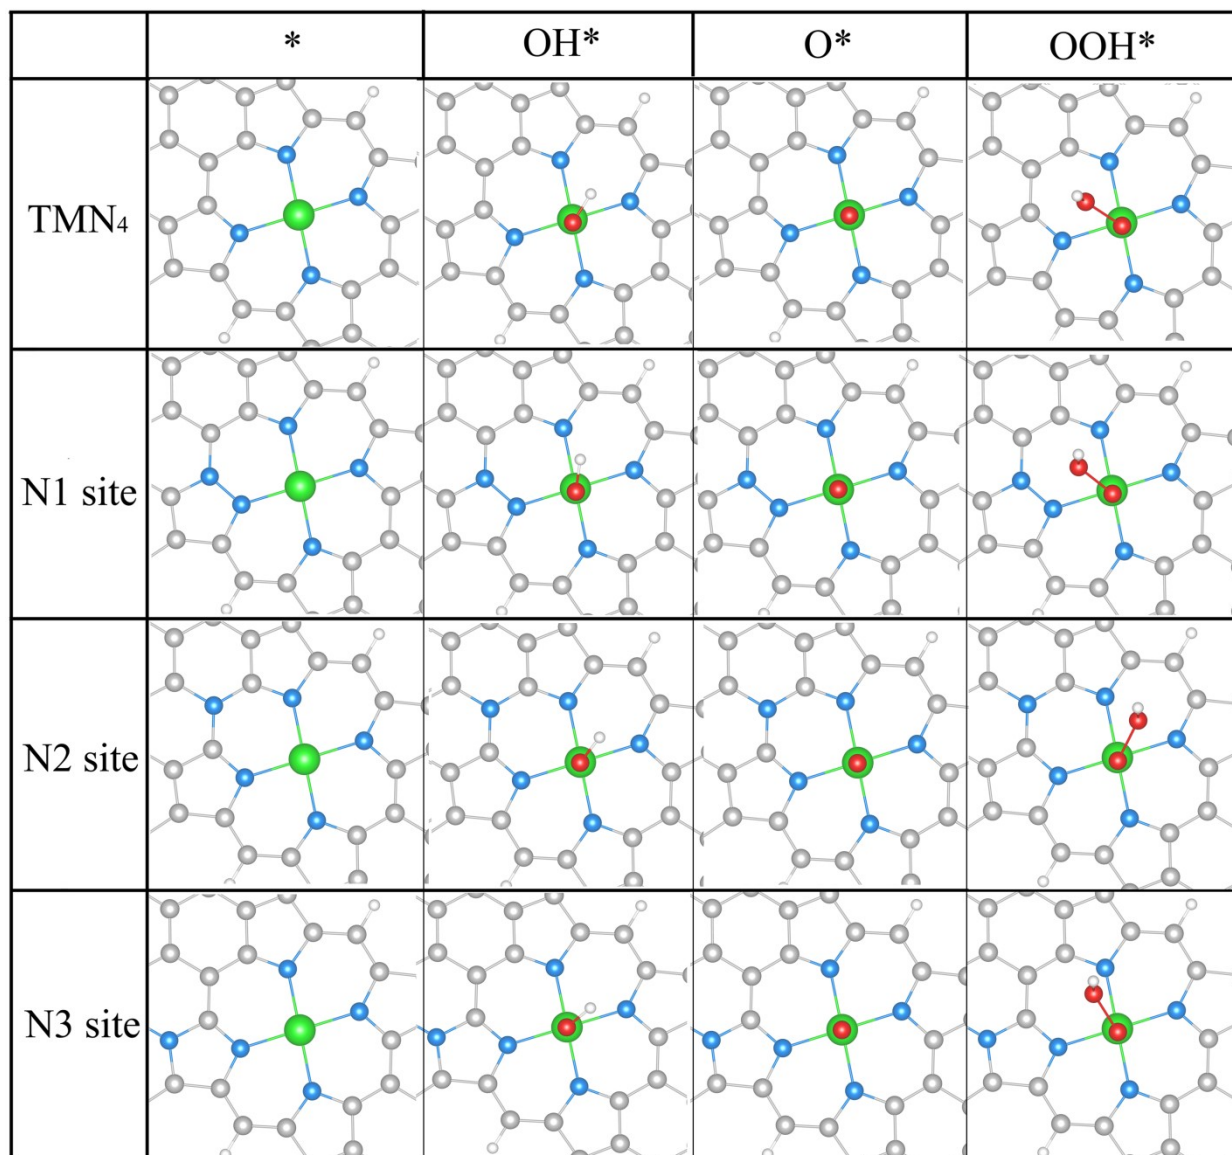

**Figure S8.** The correlations between the adsorption free energies of OER/ORR oxygenous intermediates and positions of N dopant. The differences of (a)  $\Delta G_{\text{OH}^*}$ , (c)  $\Delta G_{\text{O}^*}$  and (e)  $\Delta G_{\text{OOH}^*}$  between the pristine and N doped  $\text{TM}_1$ -pyridine  $\text{N}_4$  active centers; The differences of (b)  $\Delta G_{\text{OH}^*}$ , (d)  $\Delta G_{\text{O}^*}$  and (f)  $\Delta G_{\text{OOH}^*}$  between the pristine and N doped  $\text{TM}_1$ -pyrrolee  $\text{N}_4$  active centers.

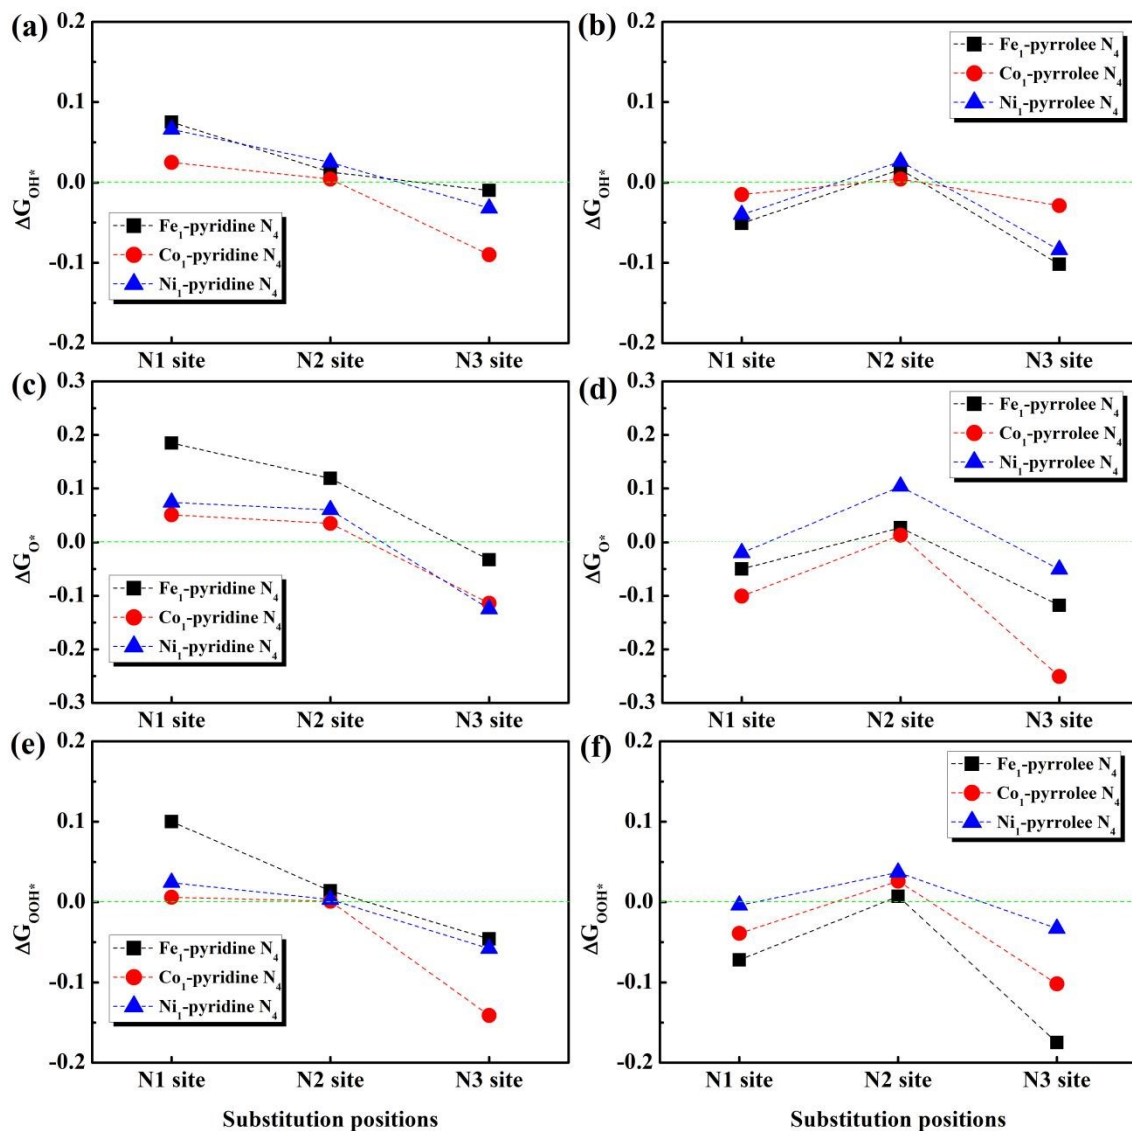



**Figure S9.** The correlations between the  $TM_1$  (and the first-shell N) atoms and adsorption free energies of (a)  $\Delta G_{OH^*}$ , (b)  $\Delta G_{O^*}$  and (c)  $\Delta G_{OOH^*}$ .

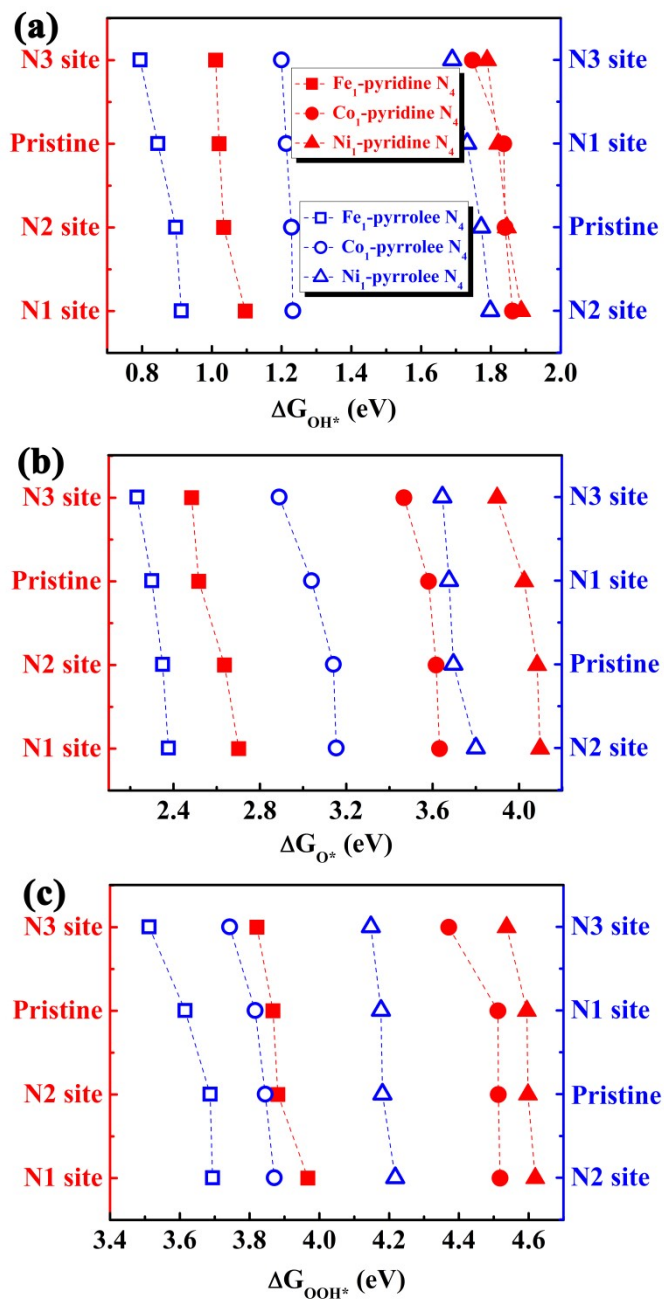

**Figure S10.** The correlations between the dynamic volume of  $d$  electrons ( $V_d$ ) and adsorption free energies of (a)  $\Delta G_{\text{OH}^*}$  (c)  $\Delta G_{\text{O}^*}$  and (e)  $\Delta G_{\text{OOH}^*}$ .

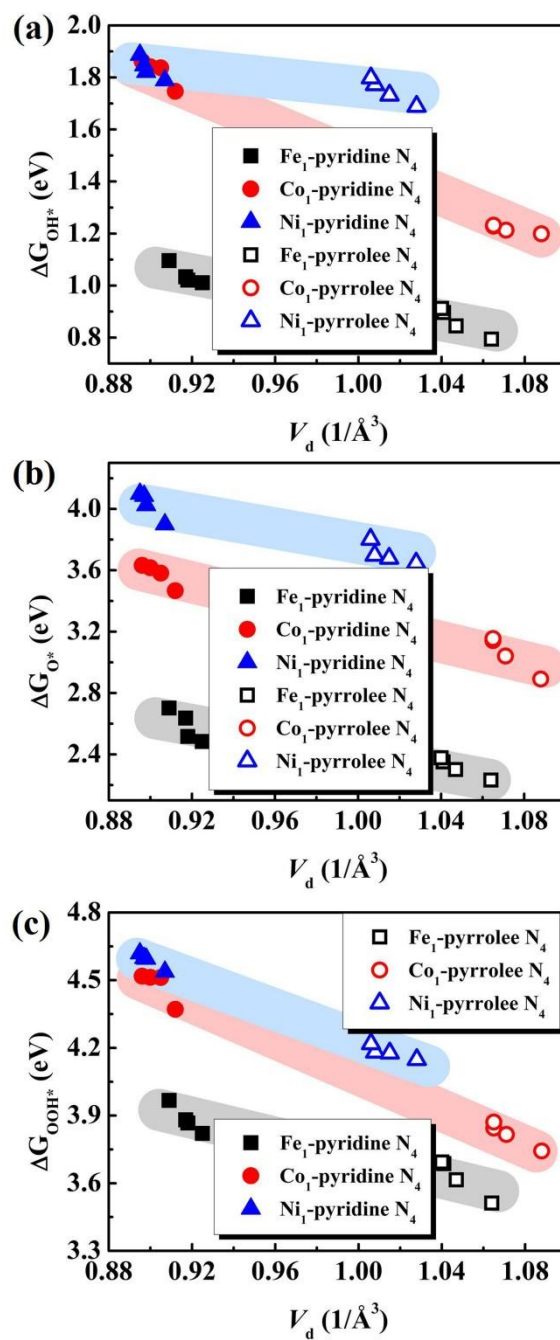

**Figure S11.** The Gibbs free energy change curves of OER/ORR on the TMN<sub>4</sub> active centers under the potential of U = 0 V. Pristine and N doped (a) Fe<sub>1</sub>-pyridine N<sub>4</sub>, (b) Fe<sub>1</sub>-pyrrolee N<sub>4</sub>, (c) Co<sub>1</sub>-pyridine N<sub>4</sub>, (d) Co<sub>1</sub>-pyrrolee N<sub>4</sub>, (e) Ni<sub>1</sub>-pyridine N<sub>4</sub>, (f) Ni<sub>1</sub>-pyrrolee N<sub>4</sub> systems.

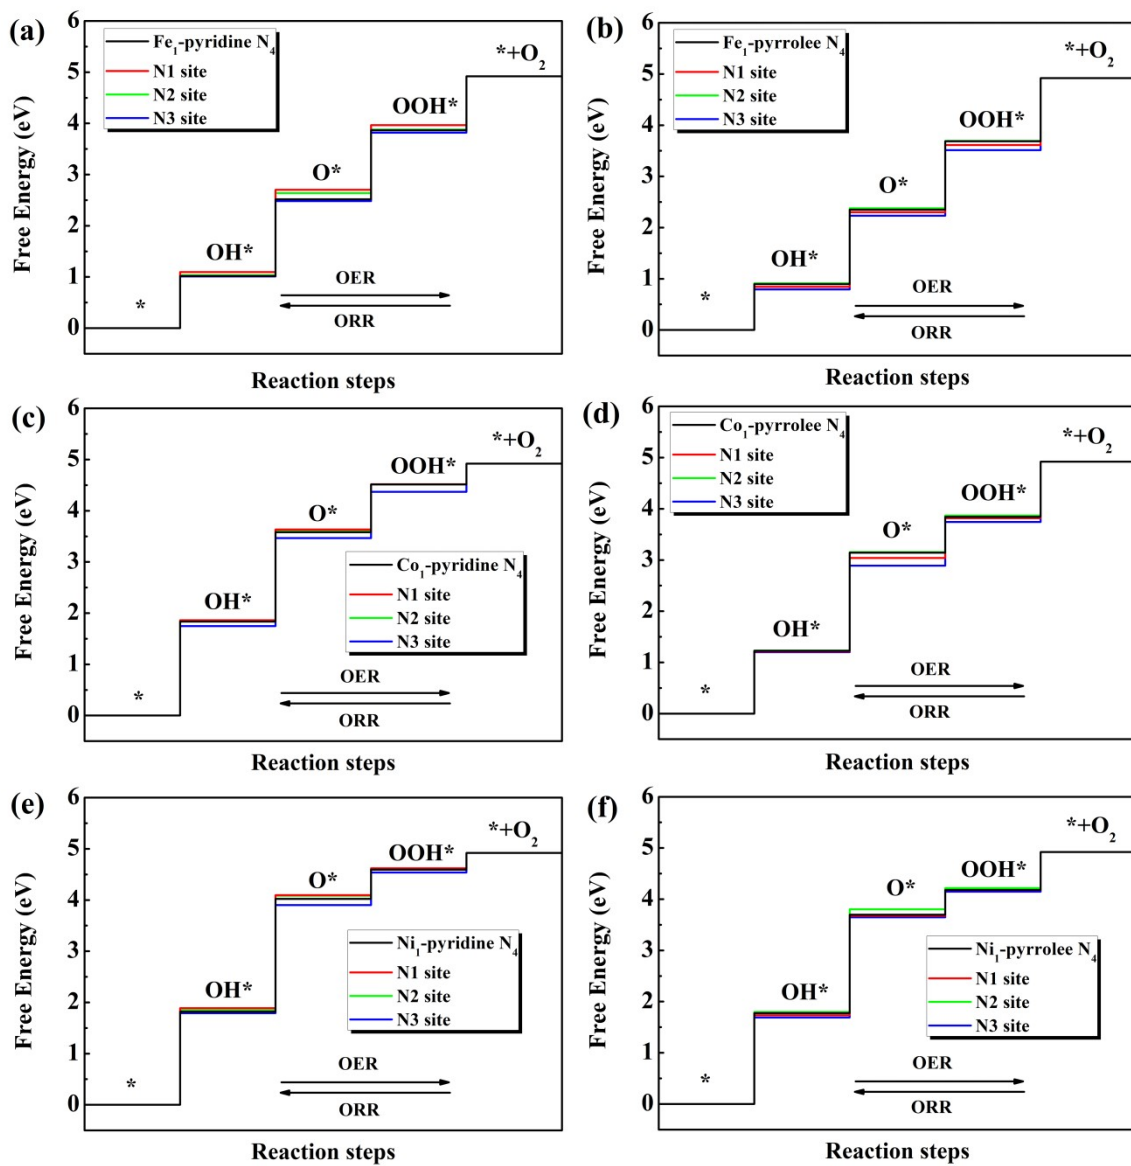

**Data S1.** The cartesian coordinate of N3-doped Fe<sub>1</sub>-pyrrole N<sub>4</sub>.

CIF file

|               |               |               |
|---------------|---------------|---------------|
| 14.3500003815 | 0.0000000000  | 0.0000000000  |
| -6.8575266854 | 12.6054289379 | 0.0000000000  |
| 0.0000000000  | 0.0000000000  | 15.0000000000 |

|    |   |   |    |
|----|---|---|----|
| C  | N | H | Fe |
| 53 | 5 | 6 | 1  |

Direct

|             |             |             |
|-------------|-------------|-------------|
| 0.528300000 | 0.970970000 | 0.103150000 |
| 0.300650000 | 0.866240000 | 0.103190000 |
| 0.357130000 | 0.979140000 | 0.103160000 |
| 0.188020000 | 0.982580000 | 0.103150000 |
| 0.357990000 | 0.807060000 | 0.103190000 |
| 0.747780000 | 0.648020000 | 0.103200000 |
| 0.959530000 | 0.700190000 | 0.103200000 |
| 0.843840000 | 0.635840000 | 0.103190000 |
| 0.803090000 | 0.525790000 | 0.103160000 |
| 0.469800000 | 0.860410000 | 0.103160000 |
| 0.475070000 | 0.691570000 | 0.103150000 |
| 0.470470000 | 0.028600000 | 0.103190000 |
| 0.698440000 | 0.133360000 | 0.103190000 |
| 0.641820000 | 0.020510000 | 0.103180000 |
| 0.811660000 | 0.017490000 | 0.103220000 |
| 0.641150000 | 0.192490000 | 0.103250000 |
| 0.040720000 | 0.299690000 | 0.102610000 |
| 0.156800000 | 0.364310000 | 0.101930000 |
| 0.529300000 | 0.139250000 | 0.103380000 |
| 0.525200000 | 0.308570000 | 0.103370000 |
| 0.971010000 | 0.528450000 | 0.103180000 |
| 0.866270000 | 0.300680000 | 0.103250000 |
| 0.979290000 | 0.357450000 | 0.103120000 |
| 0.982460000 | 0.188340000 | 0.103020000 |
| 0.807130000 | 0.357910000 | 0.103220000 |
| 0.648120000 | 0.747650000 | 0.103160000 |
| 0.700200000 | 0.959620000 | 0.103190000 |
| 0.635920000 | 0.843840000 | 0.103150000 |
| 0.525840000 | 0.803030000 | 0.103140000 |
| 0.860410000 | 0.469710000 | 0.103170000 |
| 0.691580000 | 0.475080000 | 0.103180000 |
| 0.028800000 | 0.470850000 | 0.103280000 |
| 0.133460000 | 0.698710000 | 0.103210000 |
| 0.020630000 | 0.642020000 | 0.103180000 |
| 0.017210000 | 0.811570000 | 0.103190000 |
| 0.192680000 | 0.641610000 | 0.103380000 |

|             |             |             |
|-------------|-------------|-------------|
| 0.352420000 | 0.253030000 | 0.101800000 |
| 0.299260000 | 0.040500000 | 0.103010000 |
| 0.363870000 | 0.156430000 | 0.102710000 |
| 0.473860000 | 0.197040000 | 0.103440000 |
| 0.139510000 | 0.529720000 | 0.103530000 |
| 0.308870000 | 0.525280000 | 0.102970000 |
| 0.130060000 | 0.869550000 | 0.103170000 |
| 0.188160000 | 0.811290000 | 0.103190000 |
| 0.869500000 | 0.130350000 | 0.103230000 |
| 0.811140000 | 0.188190000 | 0.103230000 |
| 0.742360000 | 0.742190000 | 0.103180000 |
| 0.635960000 | 0.364170000 | 0.103310000 |
| 0.305190000 | 0.694600000 | 0.103310000 |
| 0.364220000 | 0.635960000 | 0.103320000 |
| 0.694550000 | 0.304970000 | 0.103230000 |
| 0.253370000 | 0.352920000 | 0.100840000 |
| 0.258700000 | 0.258870000 | 0.100060000 |
| 0.197250000 | 0.474130000 | 0.103180000 |
| 0.654770000 | 0.547010000 | 0.103170000 |
| 0.453570000 | 0.345750000 | 0.102710000 |
| 0.547020000 | 0.654800000 | 0.103110000 |
| 0.345990000 | 0.453870000 | 0.101700000 |
| 0.974690000 | 0.857370000 | 0.103190000 |
| 0.025100000 | 0.142670000 | 0.103210000 |
| 0.856920000 | 0.974360000 | 0.103180000 |
| 0.142140000 | 0.025100000 | 0.103260000 |
| 0.816590000 | 0.816330000 | 0.103210000 |
| 0.184340000 | 0.185380000 | 0.098300000 |
| 0.500350000 | 0.500350000 | 0.102630000 |

**Data S2.** The cartesian coordinate of N2-doped Fe<sub>1</sub>-pyridine N<sub>4</sub>.

CIF file

|               |               |               |
|---------------|---------------|---------------|
| 14.3500003815 | 0.0000000000  | 0.0000000000  |
| -7.1750001907 | 12.4274648747 | 0.0000000000  |
| 0.0000000000  | 0.0000000000  | 18.0000000000 |

|    |   |    |
|----|---|----|
| C  | N | Fe |
| 65 | 5 | 1  |

Direct

|             |             |             |
|-------------|-------------|-------------|
| 0.305860000 | 0.029820000 | 0.076900000 |
| 0.360020000 | 0.140870000 | 0.074550000 |
| 0.472850000 | 0.031770000 | 0.074760000 |
| 0.527090000 | 0.144020000 | 0.072240000 |
| 0.639330000 | 0.032480000 | 0.073590000 |
| 0.693760000 | 0.144410000 | 0.071810000 |
| 0.806120000 | 0.032530000 | 0.074740000 |
| 0.860820000 | 0.143760000 | 0.074000000 |
| 0.972220000 | 0.031140000 | 0.076500000 |
| 0.026760000 | 0.141800000 | 0.075990000 |
| 0.138760000 | 0.029870000 | 0.077370000 |
| 0.192600000 | 0.140230000 | 0.076020000 |
| 0.303340000 | 0.195330000 | 0.074180000 |
| 0.357410000 | 0.304750000 | 0.071320000 |
| 0.470640000 | 0.199830000 | 0.071660000 |
| 0.522120000 | 0.312470000 | 0.067780000 |
| 0.637950000 | 0.200730000 | 0.070070000 |
| 0.691540000 | 0.312880000 | 0.066640000 |
| 0.804880000 | 0.199430000 | 0.071820000 |
| 0.859740000 | 0.310380000 | 0.070250000 |
| 0.971440000 | 0.198010000 | 0.074690000 |
| 0.026780000 | 0.308940000 | 0.074000000 |
| 0.137150000 | 0.195590000 | 0.075440000 |
| 0.192230000 | 0.306380000 | 0.073960000 |
| 0.301570000 | 0.360410000 | 0.071900000 |
| 0.634740000 | 0.369990000 | 0.064620000 |
| 0.691980000 | 0.482500000 | 0.062370000 |
| 0.803410000 | 0.366200000 | 0.067130000 |
| 0.860230000 | 0.477120000 | 0.066560000 |
| 0.971360000 | 0.364840000 | 0.072320000 |
| 0.028720000 | 0.475820000 | 0.072920000 |
| 0.137750000 | 0.363010000 | 0.074170000 |
| 0.196680000 | 0.473670000 | 0.074300000 |
| 0.309270000 | 0.525140000 | 0.072650000 |
| 0.699040000 | 0.647480000 | 0.063990000 |
| 0.804410000 | 0.533560000 | 0.064020000 |

|             |             |             |
|-------------|-------------|-------------|
| 0.862880000 | 0.644270000 | 0.066510000 |
| 0.972510000 | 0.531480000 | 0.070630000 |
| 0.029640000 | 0.642210000 | 0.073000000 |
| 0.140870000 | 0.530050000 | 0.075100000 |
| 0.197750000 | 0.640930000 | 0.076480000 |
| 0.309960000 | 0.694550000 | 0.075910000 |
| 0.363060000 | 0.806280000 | 0.076330000 |
| 0.479660000 | 0.695000000 | 0.071170000 |
| 0.530190000 | 0.807220000 | 0.073000000 |
| 0.697970000 | 0.811510000 | 0.070850000 |
| 0.808650000 | 0.701420000 | 0.066560000 |
| 0.863980000 | 0.811290000 | 0.071470000 |
| 0.973840000 | 0.698290000 | 0.071450000 |
| 0.029570000 | 0.809010000 | 0.074990000 |
| 0.141400000 | 0.696750000 | 0.076510000 |
| 0.196320000 | 0.807850000 | 0.077800000 |
| 0.307340000 | 0.862730000 | 0.077520000 |
| 0.361830000 | 0.974420000 | 0.076690000 |
| 0.474100000 | 0.863030000 | 0.074880000 |
| 0.528510000 | 0.975540000 | 0.074500000 |
| 0.641220000 | 0.865380000 | 0.072880000 |
| 0.695450000 | 0.976750000 | 0.074070000 |
| 0.807810000 | 0.866280000 | 0.072810000 |
| 0.861650000 | 0.977020000 | 0.075340000 |
| 0.974020000 | 0.864990000 | 0.074880000 |
| 0.028420000 | 0.975740000 | 0.076930000 |
| 0.140440000 | 0.863690000 | 0.077590000 |
| 0.194940000 | 0.974440000 | 0.077860000 |
| 0.645780000 | 0.703400000 | 0.066700000 |
| 0.366980000 | 0.637710000 | 0.073260000 |
| 0.360080000 | 0.467680000 | 0.070220000 |
| 0.464720000 | 0.363680000 | 0.067890000 |
| 0.536530000 | 0.642440000 | 0.067380000 |
| 0.640630000 | 0.541360000 | 0.061910000 |
| 0.500980000 | 0.504640000 | 0.065610000 |

## Notes and References

- [1] M. Hu, S. Li, S. Zheng, X. Liang, J. Zheng and F. Pan, *J. Phys. Chem. C*, 2020, **124**, 13168-13176.
- [2] J. Wang, J. Bai, Y. Cang, Q. Li, X. Fan and H. Lin, *Catalysts*, 2023, **13**, 1378.
- [3] H Niu, X Wan, X Wang, C Shao, J Robertson, Z Zhang and Y Guo, *ACS Sustain. Chem. Eng.*, 2021, **9**, 3590-3599.
- [4] Z. Xue, X. Zhang, J. Qin and R. Liu, *J. Energy. Chem.*, 2021, **55**, 437-443.
- [5] X Li, Z Su, Z Zhao, Q Cai, Y Li and J Zhao, *J. Colloid. Interf. Sci.*, 2022, **607**, 1005-1013.
- [6] Z Xue, R Tan, J Tian, H Hou, X Zhang and Y Zhao, *J. Colloid. Interf. Sci.*, 2024, **667**, 679-687.
- [7] M. Chen, M. Luo, C. Liu C, X. Qi, SG Peera and T. Liang, *Comput. Theor. Chem.*, 2020, **1187**, 112945.
- [8] C Fang, X Wang, Q Zhang, X Zhang, C Shi, J Xu and M Yang, *Nano Res.*, 2024, **17**, 2337-51.
